# Supplementary material for: The p38 MAPK Inhibitor SB203580 Abrogates Tumor Necrosis Factor-Induced Proliferative Expansion of Mouse CD4+Foxp3+ Regulatory T Cells
Source: PubMed Central journal article supplement (PMC6046375; doi:10.3389/fimmu.2018.01556), 2018-07-09
Supplement: Presentation_1.pdf [file Presentation_1.pdf]

## *Supplementary Material*

### **The p38 MAPK Inhibitor SB203580 Abrogates TNF-Induced Proliferative Expansion of Mouse CD4<sup>+</sup>Foxp3<sup>+</sup> Regulatory T Cells**

**Tianzhen He<sup>1</sup>, Shuoyang Liu<sup>1</sup>, Shaokui Chen<sup>1</sup>, Jingyi Ye<sup>1</sup>, Xueqiang Wu<sup>2</sup>, Zhaoxiang Bian<sup>3</sup>, and Xin Chen<sup>1\*</sup>**

1. State Key Laboratory of Quality Research in Chinese Medicine, Institute of Chinese Medical Sciences, University of Macau, Macau SAR 999078, China

2. Department of Oncology, Beijing Aerospace General Hospital, Beijing 100076, China

3. School of Chinese Medicine, Hong Kong Baptist University, Kowloon, Hong Kong SAR, China.

\* Corresponding author: Dr. Xin Chen, Institute of Chinese Medical Sciences, University of Macau, Avenida da Universidade, Taipa, Macau SAR 999078, China. Tel.: (853) 8822 4513; Fax: (853) 2884 1358. E-mail address: xchen@umac.mo

## 1.1 Supplementary Figures

### Supplementary Figure 1

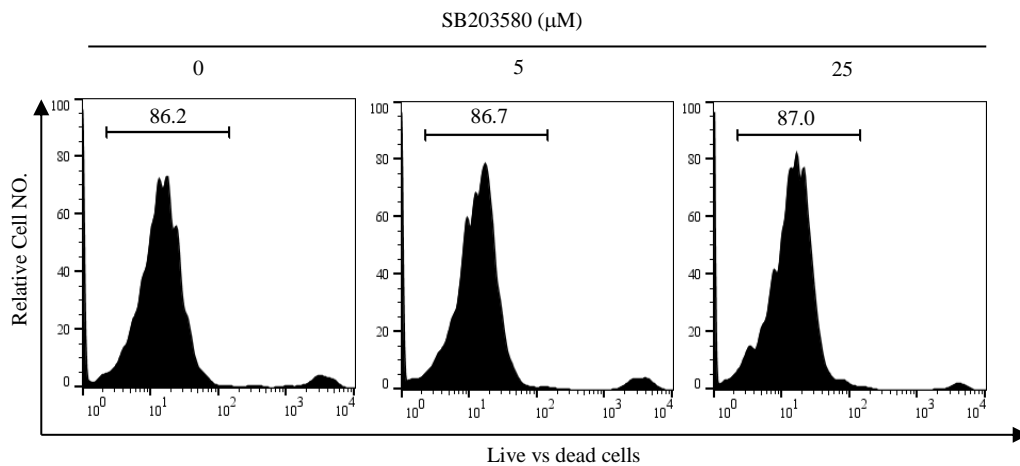

**Effect of SB203580 on the viability of cultured CD4<sup>+</sup> T cells.** CD4<sup>+</sup> cells were isolated from LNs and spleen of normal C57BL/6J mice. The cells were labeled with CFSE and cultured in the presence of IL-2 + TNF (10 ng/mL), with different concentrations of SB203580 (0, 5, 25 μM). After 72 hours, cells were collected and stained with LIVE/DEAD dye, and their viability was analyzed by FACS. The left peaks represent live cells. Data shown are representatives of at least three separate experiments with similar results.

### Supplementary Figure 2

(A)

(B)

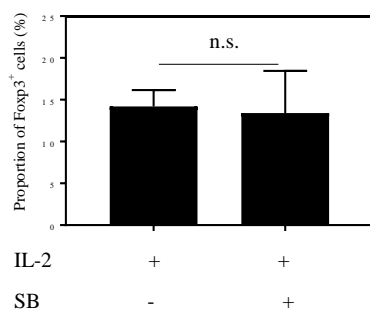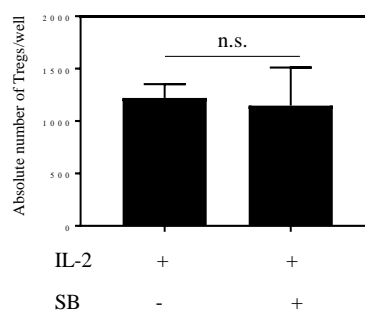

**Effect of SB203580 (SB) on the proportion and number of Foxp3<sup>+</sup> Tregs in CD4<sup>+</sup> cells cultured with IL-2 alone.** CD4<sup>+</sup> cells were isolated from LNs and spleen of normal C57BL/6J mice. The cells were cultured in the presence of IL-2 (10 ng/mL), with or without 25 μM SB203580. After 72 hours, the proportion of Foxp3<sup>+</sup> cells was analyzed by FACS (A). The number of Foxp3-expressing Tregs was calculated (B). Data (N=3, Means ± SEM) shown are representatives of at least three separate experiments with similar results. n.s.: Not significant statistically.

## Supplementary Figure 3

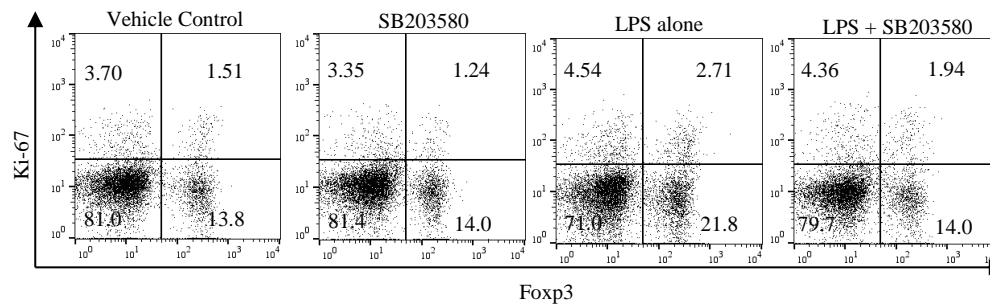

**Effect of SB203580 on the expansion of Tregs in mice.** Normal C57BL/6J mice were injected with 200  $\mu$ g of LPS (i.p.) or PBS, and treated with or without SB203580 (25 mg/kg/d, i.p.). The spleen and lymph nodes were harvested 72 hours after treatment. Expression of Ki-67 by Foxp3<sup>-</sup> and Foxp3<sup>+</sup> cells was analyzed by FACS. Number in the dot plots shows the proportion of cells in the respective quadrants.

## Supplementary Figure 4

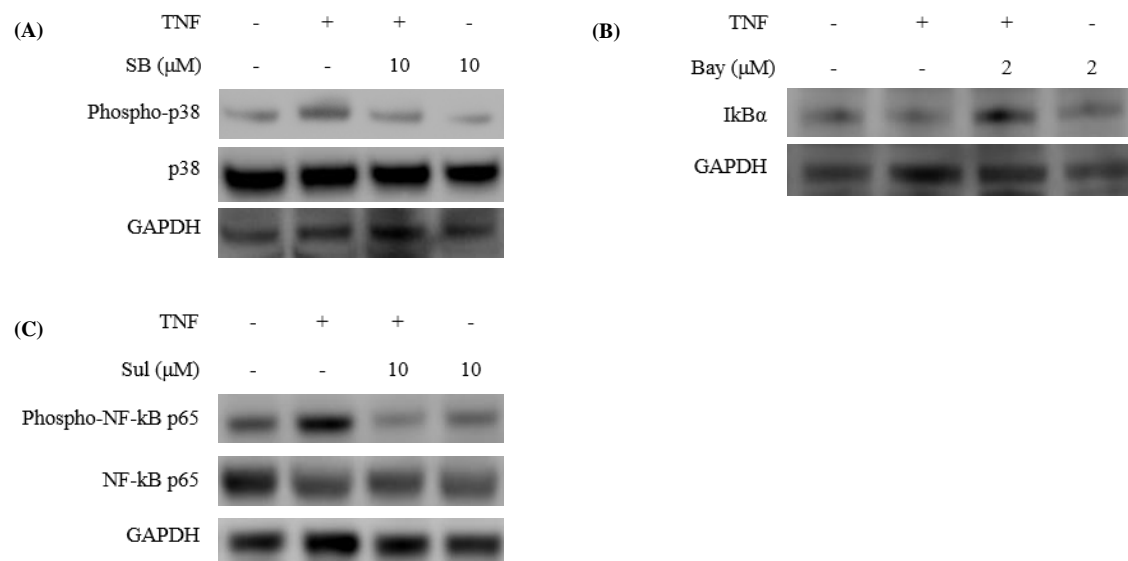

**Effects of SB203580, Bay 11-7082 and Sulfasalazine on TNF-induced activation of p38 MAPK and NF- $\kappa$ B pathways.** Mouse CD4<sup>+</sup>CD25<sup>+</sup> T cells were stimulated with TNF (100 ng/mL) with or without selected inhibitors (SB203580 (SB), Bay 11-7082 (Bay), Sulfasalazine (Sul)) for 30 min. The activities of p38 and NF- $\kappa$ B pathways were determined using phospho-specific antibodies; protein levels were determined by anti-p38, anti-I $\kappa$ B $\alpha$  and anti- NF- $\kappa$ B p65 antibodies, respectively. Data shown are representative of at least three independent experiments.

## 1.2 Supplementary Table

Supplementary Table 1.

| Gene Ontology-Biological Processes             | p-value     | Gene Symbols                                                                                                                                                         |
|------------------------------------------------|-------------|----------------------------------------------------------------------------------------------------------------------------------------------------------------------|
| Activation of MAPK activity                    | 0.00003399  | <b>MAP2K3(MKK3)</b>  TAB2 TRAF6 FRS2 MAPKAPK3 MAP3K2 IRAK2 TGFA  <b>MAPK14(p38<math>\alpha</math>)</b>  TNF MAP2K6 TAB3 CHRNA7 DRD4 TLR4 NOD2 NTF3 P2RX7 WNT5A IRAK1 |
| Positive regulation of NF- $\kappa$ B activity | 0.000002195 | TAB3 PYCARD CFLAR TLR2 NFKBIA NFKBIB TRAF1 IKBKB AMH  <b>NFKB1</b>   <b>TRAF2</b>  IRAK2  <b>NFKB2</b>  ICAM1 TRAF6 TNF FER TAB2 NOD2 WNT5A TLR4 IRAK1 ADAM8 PSMA6   |

**Gene ontology(GO) analysis of MAPK and NF- $\kappa$ B activity in TNF-treated human Tregs.** GSE18893, a profile dataset generated by Nagar M, Jacob-Hirsch J and Goldstein I, was downloaded from GEO website ([www.ncbi.nlm.nih.gov/geo/query/acc.cgi?acc=GSE18893](http://www.ncbi.nlm.nih.gov/geo/query/acc.cgi?acc=GSE18893)). Genes significantly differentially expressed (DE) between TNF-treated human Tregs and untreated Tregs was evaluated with Gene Ontology enrichment analysis using web-based online tool GCBI ([www.gcbi.com.cn/gclib/html/index](http://www.gcbi.com.cn/gclib/html/index)). The key genes associated with the activation of p38 MAPK and NF- $\kappa$ B pathway by TNF stimulation are marked in bold.

Supplementary Table 2

| Pathway Name                     | p-value           | Gene Symbols                                                                                                                                                                                                                                                                                                                                                                     |
|----------------------------------|-------------------|----------------------------------------------------------------------------------------------------------------------------------------------------------------------------------------------------------------------------------------------------------------------------------------------------------------------------------------------------------------------------------|
| MAPK signaling pathway           | 0.000000000253    | BRAF DUSP1 CHP2 HSPA6 RASGRP3 GADD45A FLNB FGF22 MAPK8IP2 <br><b>MAPK14(p38<math>\alpha</math>)</b>  PLA2G4C MAX FLNC DUSP5 TAB2 BDNF SOS2 RELB MAP3K2 MAP2K6 <br><b>MAP2K3(MKK3)</b>  SOS1 FGF3 TAOK1 ARRB2 MAP3K8 RASGRP1 MECOM NTF3 MAPKAPK3 RASGRP4 STMN1 RRAS2 PAK2 TNF FGF19  <b>TRAF2</b>  JUN NGF PRKACA IKBKB TP53 NFKB2 NFKB1 TRAF6 IL1R1 MYC GADD45B DUSP7 NFATC2 FAS |
| NF- $\kappa$ B signaling pathway | 0.000000000000730 | <b>TRAF2</b>  ATM  <b>NFKB2</b>   <b>RELB</b>  TRAF1 TAB2 IL1R1 LCK CCL13 LTA TAB3 TLR4 TNFAIP3 DDX58 PARP1 CFLAR NFKBIA BCL2L1 LTB TNFSF13B GADD45B IRAK1 IKBKB CSNK2B TRAF3 TNF  <b>NFKB1</b>  BIRC2 CXCL2 TRAF6 BIRC3 ICAM1                                                                                                                                                   |

**Pathway analysis of MAPK and NF- $\kappa$ B activity in TNF-treated human Tregs.** Analysis of GSE18893 file with Kyoto Encyclopedia of Genes and Genomes (KEGG) pathway enrichment was performed with GCBI. The key genes associated with downstream of p38 MAPK and NF- $\kappa$ B pathway in TNF-treated Tregs are marked in bold.
